# Supplementary material
Source: PubMed Central journal article supplement (PMC4301583)
Supplement: NIHMS654403-supplement-Supplementary_data.pdf [file NIHMS654403-supplement-Supplementary_data.pdf]

**Table 1: Prevalence of Early and Late microvascular obstruction (MVO) in different studies**

| Study                  | No. of patients | Prevalence of Early MVO n.(%) | CMR sequence     | Contrast Concentration | Time of imaging (post contrast) | Prevalence of Late MVO n. (%) | CMR sequence | Contrast Concentration | Time of imaging (post contrast)) |
|------------------------|-----------------|-------------------------------|------------------|------------------------|---------------------------------|-------------------------------|--------------|------------------------|----------------------------------|
| Lund et al,2004        | 60              | 23 (38%)                      | FPP (SR-GRE)     | 0.1 mmol /kg           | Immediately                     | 19 (32%)                      | IR-GRE       | 0.1 mmol               | 10 min                           |
| Cochet et al, 2009     | 184             | 127 (87%)                     | FPP (IR-GRE)     | 0.1 mmol/kg            | Immediately                     | 87 (47%)                      | IR GRE       | 0.1 mmol/kg            | 10 min                           |
| Bekkers et al, 2009    | 84              | 53(63%)                       | FPP (IR-GRE)     | 0.2 mmol/kg            | 2 min                           | 45(54%)                       | IR-GRE       | 0.2 mmol/kg            | 10 min                           |
| Cochet et al, 2010     | 61              | 28 (46%)                      | FPP (SR-GRE)     | 0.1 mmol/kg            | Immediately                     | 17 (28%)                      | PSIR-GRE     | 0.1 mmol/kg            | 10 min                           |
| De waha et al, 2010    | 438             | 332 (78%)                     | FPP (IR-GRE)     | 0.15 mmol/kg           | Immediately                     | 296 (67.5%)                   | IR GRE       | 0.15 mmol/kg           | 15 min                           |
| De waha et al, 2012    | 322             | 257 (82%)                     | FPP (IR-GRE)     | 0.2 mmol/kg            | 1 min                           | 228 (72%)                     | IR-GRE       | 0.2 mmol/kg            | 15 min                           |
| Bogaert et al, 2007    | 52              | 32 (61%)                      | FPP (SR-GRE)     | 0.05 mmol/kg           | 2-5 min                         | 27 (52%)                      | 3D-IR-GRE    | 0.2 mmol/kg            | 10-25 min                        |
| Yan et al, 2006        | 25              | 21(84%)                       | FPP (SR-GRE-EPI) | 0.1 mmol/kg            | immediate                       | 9 (36%)                       | IR-GRE       | 0.2 mmol/kg            | 10 min                           |
| Nijveldt et al, 2009   | 63              | 44(70%)                       | FPP (SR GRE)     | 0.1 mmol/kg            | Immediately                     | 37 (59%)                      | IR-GRE       | 0.2 mmol/kg            | 12-15 min                        |
| Nijveldt et al, 2008   | 60              | 41 (68%)                      | FPP (SR-GRE)     | 0.1 mmol/kg            | Immediately                     | 34 (57%)                      | IR-GRE       | 0.2 mmol/kg            | 12-15 min                        |
| Weir et al,2010        | 100             | 69(69%)                       | FPP (IR-SSFP)    | 0.1 mmol/kg            | 2 min                           | 56(56%)                       | IR-GRE       | 0.1 mmol/kg            | 15 min                           |
| Wong et al, 2012       | 40              | 29 (73%)                      | FPP (SR-GRE)     | 0.1 mmol/kg            | immediately                     | 31 (78%)                      | IR-GRE       | 0.2 mmol/kg            | 10 min                           |
| Orn et al, 2009        | 42              | 16(38%)day 2; 15 (34%) 1 wk   | FPP (SR-GRE)     | 0.075 mmol/kg          | Immediately                     | 14(33%) day 2; 9 (21%) 1 wk   | IR-GRE       | 0.25 mmol/kg           | 10-15 min                        |
| Wu et al, 1998         | 44              | 11 (25%)                      | FPP (IR-GRE)     | 0.1 mmol/kg            | Immediately                     |                               |              |                        |                                  |
| Klug et al, 2012       | 107             | 74(69%)                       | FPP (IR-SSFP)    | 0.1 mmol/kg            | Immediately                     |                               |              |                        |                                  |
| Mather et al, 2011     | 48              | 30 (63%)                      | FPP (IR-GRE)     | 0.2 mmol/kg            | 1-4 min                         |                               |              |                        |                                  |
| Eitel et al,2013       | 795             | 390 (49%)                     | FPP (IR-GRE)     | 0.15 mmol/kg           | Immediately                     |                               |              |                        |                                  |
| Bruder et al, 2008     | 67              | 41 (61%)                      | FPP (IR-SSFP)    | 0.2 mmol/kg            | Immediately                     |                               |              |                        |                                  |
| Amabile et al, 2010    | 112             |                               |                  |                        |                                 | 63 (56%)                      | IR-GRE       | 0.2 mmol/kg            | 10 min                           |
| Malek et al, 2012      | 53              |                               |                  |                        |                                 | 32 (60%)                      | IR-GRE       | 0.1 mmol/kg            | 10-15 min                        |
| Vicente et al, 2009    | 39              |                               |                  |                        |                                 | 26 (68%)                      | 3D-IR-GRE    | 0.2 mmol/kg            | 10 min                           |
| Tarantini et al, 2006  | 76              |                               |                  |                        |                                 | 28 (36%)                      | IR-GRE       | 0.2 mmol/kg            | 10 min                           |
| Hadamitzky et al, 2013 | 283             |                               |                  |                        |                                 | 99 (35%)                      | IR-GRE       | 0.2 mmol/kg            | 15 min                           |
| Hombach et al, 2005    | 110             |                               |                  |                        |                                 | 51 (46%)                      | 3D-IR-GRE    | 0.2 mmol/kg            | 6-12 min                         |
| Wu et al, 2008         | 122             |                               |                  |                        |                                 | 51 (42%)                      | IR-GRE       | 0.2 mmol/kg            | 10 min                           |
| Bodi et al, 2009       | 214             |                               |                  |                        |                                 | 67 (31%)                      | IR-SSFP      | 0.1 mmol/kg            | 10 min                           |
| Eitel et al, 2011      | 346             |                               |                  |                        |                                 | 236 (66%)                     | IR-GRE       | 0.2 mmol/kg            | 10-15 min                        |

|                      |                            |                    |  |  |  |                    |        |             |           |
|----------------------|----------------------------|--------------------|--|--|--|--------------------|--------|-------------|-----------|
| Nijveldt et al, 2007 | 40                         |                    |  |  |  | 23 (57.5%)         | IR-GRE | 0.2 mmol/kg | 12-15 min |
| Pooled               | 2607 (EMVO)<br>2926 (LMVO) | 65% (Range: 63-66) |  |  |  | 54% (Range: 52-56) |        |             |           |

Abbreviation: FPP: First pass perfusion, IR: Inversion Recovery, SR: Saturation Recovery, GRE: gradient echo, PSIR: Phase sensitive inversion recovery, SSFP – steady state free precession, EPI-echoplanar imaging.

**Table 2: Prevalence of Intramyocardial Hemorrhage (IMH) in different studies**

| Study                | No. of patients n. (%) | Prevalence of IMH (n.(%)) |
|----------------------|------------------------|---------------------------|
| Ochiai et al, 1999   | 39                     | 13 (33%)                  |
| Ganame et al, 2009   | 98                     | 24 (24%)                  |
| O'Reagan et al, 2010 | 50                     | 29 (58%)                  |
| Mather et al, 2010   | 48                     | 12 (25%)                  |
| Beek et al, 2010     | 45                     | 22 (49%)                  |
| Beekers et al, 2010  | 90                     | 39 (43%)                  |
| Husser et al, 2010   | 304                    | 102 (33.5%)               |
| Pooled               | 674                    | 35% (Range: 31-38)        |

**Table 3a: Data from studies looking at effect of Intramyocardial hemorrhage (IMH) on baseline left ventricular ejection fraction (LVEF)**

| Study                                                                                                     | IMH present |     |       | IMH absent |     |       | Weight  | Mean difference<br>IV, Random, 95% CI |
|-----------------------------------------------------------------------------------------------------------|-------------|-----|-------|------------|-----|-------|---------|---------------------------------------|
|                                                                                                           | Mean        | SD  | Total | Mean       | SD  | Total |         |                                       |
| Ochiai_1999                                                                                               | 47          | 9   | 13    | 53         | 10  | 26    | 9.30%   | -6.00 [-12.22, 0.22]                  |
| O'Reagan_2012                                                                                             | 51          | 11  | 29    | 59         | 7   | 21    | 12.20%  | -8.00 [-13.00, -3.00]                 |
| Mather_2010                                                                                               | 34.6        | 8.1 | 12    | 46.1       | 9.3 | 18    | 9.20%   | -11.50 [-17.78, -5.22]                |
| Husser_2012                                                                                               | 43          | 11  | 102   | 56         | 12  | 202   | 20.30%  | -13.00 [-15.70, -10.30]               |
| Ganame_2009                                                                                               | 42.8        | 6.5 | 24    | 49.3       | 7.9 | 74    | 18.40%  | -6.50 [-9.66, -3.34]                  |
| Beekers_2010                                                                                              | 47          | 7   | 39    | 55         | 8   | 41    | 17.90%  | -8.00 [-11.29, -4.71]                 |
| Beek_2010                                                                                                 | 38.9        | 8.1 | 22    | 46.4       | 8.4 | 23    | 12.70%  | -7.50 [-12.32, -2.68]                 |
| Total (95% CI)                                                                                            |             |     | 241   |            |     | 405   | 100.00% | -8.81 [-11.13, -6.49]                 |
| Heterogeneity: Tau <sup>2</sup> = 4.99; Chi <sup>2</sup> = 13.14, df = 6 (P = 0.04); I <sup>2</sup> = 54% |             |     |       |            |     |       |         |                                       |
| Test for overall effect: Z = 7.45 (P < 0.00001)                                                           |             |     |       |            |     |       |         |                                       |

**Table 3b: Data from studies looking at effect of Intramyocardial hemorrhage (IMH) on baseline Infarct size (IS):**

| Study                                                                                                        | IMH present |      |       | IMH absent |      |       | Weight  | Mean difference<br>IV, Random, 95% CI |
|--------------------------------------------------------------------------------------------------------------|-------------|------|-------|------------|------|-------|---------|---------------------------------------|
|                                                                                                              | Mean        | SD   | Total | Mean       | SD   | Total |         |                                       |
| O'Reagan_2012                                                                                                | 23.8        | 8.2  | 29    | 12         | 5.9  | 21    | 23.80%  | 11.80 [7.89, 15.71]                   |
| Beek_2010                                                                                                    | 24.4        | 7    | 22    | 11.3       | 7.3  | 23    | 22.80%  | 13.10 [8.92, 17.28]                   |
| Ganame_2009                                                                                                  | 28.9        | 12.2 | 24    | 15.8       | 11.2 | 74    | 18.20%  | 13.10 [7.59, 18.61]                   |
| Husser_2012                                                                                                  | 35          | 15   | 102   | 16         | 11   | 202   | 26.20%  | 19.00 [15.72, 22.28]                  |
| Mather_2010                                                                                                  | 36.2        | 15.3 | 12    | 16.3       | 9.4  | 18    | 9.10%   | 19.90 [10.22, 29.58]                  |
| Total (95% CI)                                                                                               |             |      | 189   |            |      | 338   | 100.00% | 14.96 [11.54, 18.37]                  |
| Heterogeneity: Tau <sup>2</sup> = 8.79; Chi <sup>2</sup> = 10.49,<br>df = 4 (P = 0.03); I <sup>2</sup> = 62% |             |      |       |            |      |       |         |                                       |
| Test for overall effect: Z = 8.59 (P <<br>0.00001)                                                           |             |      |       |            |      |       |         |                                       |

**Table 3c: Data from studies looking at effect of Intramyocardial hemorrhage (IMH) on baseline Left ventricular end-diastolic volume index (LVEDVi)**

| Study                                                                                                    | IMH present |      |       | IMH absent |      |       | Weight  | Mean difference<br>IV, Random, 95% CI |
|----------------------------------------------------------------------------------------------------------|-------------|------|-------|------------|------|-------|---------|---------------------------------------|
|                                                                                                          | Mean        | SD   | Total | Mean       | SD   | Total |         |                                       |
| Beek_2010                                                                                                | 104         | 22   | 22    | 89         | 22   | 23    | 8.80%   | 15.00 [2.14, 27.86]                   |
| Beekers_2010                                                                                             | 88          | 17   | 39    | 81         | 14   | 41    | 27.10%  | 7.00 [0.16, 13.84]                    |
| Husser_2012                                                                                              | 91          | 27   | 102   | 75         | 21   | 202   | 33.50%  | 16.00 [10.01, 21.99]                  |
| Mather_2010                                                                                              | 102.1       | 12.6 | 12    | 85.4       | 14.7 | 18    | 14.40%  | 16.70 [6.85, 26.55]                   |
| O'Reagan_2012                                                                                            | 81          | 21.4 | 29    | 67.1       | 11.4 | 21    | 16.30%  | 13.90 [4.71, 23.09]                   |
| Total (95% CI)                                                                                           |             |      | 204   |            |      | 305   | 100.00% | 13.24 [9.32, 17.16]                   |
| Heterogeneity: Tau <sup>2</sup> = 2.59; Chi <sup>2</sup> = 4.58, df = 4 (P = 0.33); I <sup>2</sup> = 13% |             |      |       |            |      |       |         |                                       |
| Test for overall effect: Z = 6.62 (P < 0.00001)                                                          |             |      |       |            |      |       |         |                                       |

**Table 3d: Data from studies looking at effect of Intramyocardial hemorrhage (IMH) baseline Left ventricular end-systolic volume index (LVESVi)**

| Study                                                                           | IMH present |      |       | IMH absent |      |       | Weight  | Mean difference<br>IV, Random, 95% CI |
|---------------------------------------------------------------------------------|-------------|------|-------|------------|------|-------|---------|---------------------------------------|
|                                                                                 | Mean        | SD   | Total | Mean       | SD   | Total |         |                                       |
| Amabile_2012                                                                    | 46.8        | 16.3 | 11    | 33.5       | 11.7 | 103   | 8.10%   | 13.30 [3.41, 23.19]                   |
| Beek_2010                                                                       | 65          | 19   | 22    | 49         | 17   | 23    | 7.10%   | 16.00 [5.45, 26.55]                   |
| Beekers_2010                                                                    | 47          | 13   | 39    | 38         | 11   | 41    | 28.30%  | 9.00 [3.71, 14.29]                    |
| Husser_2012                                                                     | 53          | 23   | 102   | 34         | 17   | 202   | 31.20%  | 19.00 [13.96, 24.04]                  |
| Mather_2010                                                                     | 66.8        | 11.5 | 12    | 46.7       | 13.9 | 18    | 9.50%   | 20.10 [10.96, 29.24]                  |
| O'Reagan_2012                                                                   | 41.1        | 17.1 | 29    | 28.3       | 7.9  | 21    | 15.80%  | 12.80 [5.72, 19.88]                   |
| Total (95% CI)                                                                  |             |      | 215   |            |      | 408   | 100.00% | 14.62 [11.80, 17.43]                  |
| Heterogeneity: Chi <sup>2</sup> = 9.00, df = 5 (P = 0.11); I <sup>2</sup> = 44% |             |      |       |            |      |       |         |                                       |
| Test for overall effect: Z = 10.18 (P < 0.00001)                                |             |      |       |            |      |       |         |                                       |

**Table 4a: Data from studies looking at effect of early microvascular obstruction (EMVO) on baseline left ventricular ejection fraction (LVEF)**

| Study                                                                                                       | Early MVO Present |      |                | Early MVO Absent |      |                | Weight  | Mean difference<br>IV, Random (95% CI) |
|-------------------------------------------------------------------------------------------------------------|-------------------|------|----------------|------------------|------|----------------|---------|----------------------------------------|
|                                                                                                             | Mean              | SD   | Total patients | Mean             | SD   | Total patients |         |                                        |
| Amabile (early),2010                                                                                        | 46.7              | 1.5  | 63             | 53.4             | 1.6  | 49             | 17.80%  | -6.70 [-7.28, -6.12]                   |
| Bekkers(early), 2009*                                                                                       | 49                | 7    | 53             | 56               | 7    | 31             | 12.30%  | -7.00 [-10.10, -3.90]                  |
| Bogaert (early),2007*                                                                                       | 46.1              | 7.2  | 32             | 50.4             | 6.5  | 20             | 10.60%  | -4.30 [-8.09, -0.51]                   |
| Cochet (early) 2010                                                                                         | 50                | 17   | 28             | 60               | 10   | 33             | 5.10%   | -10.00 [-17.16, -2.84]                 |
| Klug (early) 2012                                                                                           | 39.2              | 11.4 | 74             | 46.1             | 8.9  | 33             | 10.10%  | -6.90 [-10.90, -2.90]                  |
| mather (early), 2011*                                                                                       | 47.1              | 8.1  | 30             | 53               | 8.6  | 18             | 8.20%   | -5.90 [-10.82, -0.98]                  |
| Nijveldt (early), 2009#                                                                                     | 40.7              | 8.7  | 44             | 46.4             | 8.8  | 19             | 8.60%   | -5.70 [-10.42, -0.98]                  |
| Orn(early2d),2 days*                                                                                        | 49.3              | 2.4  | 16             | 50.5             | 2.8  | 11             | 15.10%  | -1.20 [-3.23, 0.83]                    |
| Weir (early), 2010                                                                                          | 48.3              | 8    | 69             | 50.5             | 10.1 | 31             | 10.10%  | -2.20 [-6.23, 1.83]                    |
| Wu(early),1998,                                                                                             | 48.8              | 20   | 11             | 54.3             | 12   | 33             | 2.10%   | -5.50 [-18.01, 7.01]                   |
| Total (95% CI)                                                                                              |                   |      | 420            |                  |      | 278            | 100.00% | -5.21 [-7.13, -3.30]                   |
| Heterogeneity: Tau <sup>2</sup> = 5.24; Chi <sup>2</sup> = 32.43, df = 9 (P = 0.0002); I <sup>2</sup> = 72% |                   |      |                |                  |      |                |         |                                        |

\*= Assessed eMVO on early post gadolinium enhanced images 2-5 min post contrast administration. #= Assessed eMVO both on first pass perfusion as well as on early post gadolinium enhanced images.

**Table 4b: Data from studies looking at effect of early microvascular obstruction (EMVO) on baseline Infarct size (IS):**

| Study                                                                                                        | Early MVO Present |      |                | Early MVO Absent |      |                | Mean difference |                      |
|--------------------------------------------------------------------------------------------------------------|-------------------|------|----------------|------------------|------|----------------|-----------------|----------------------|
|                                                                                                              | Mean              | SD   | Total patients | Mean             | SD   | Total patients | Weight          | IV, random (95% CI)  |
| Amabile (early),2010                                                                                         | 18.7              | 1.2  | 63             | 9                | 1.3  | 49             | 15.70%          | 9.70 [9.23, 10.17]   |
| Bekkers(early), 2009_base                                                                                    | 21                | 9    | 53             | 6                | 8    | 31             | 10.90%          | 15.00 [11.28, 18.72] |
| Bogaert (early),2007,base                                                                                    | 20.7              | 10.8 | 32             | 11.3             | 7.5  | 20             | 8.80%           | 9.40 [4.42, 14.38]   |
| Cochet (early) 2010                                                                                          | 15                | 7    | 28             | 4                | 6    | 33             | 11.70%          | 11.00 [7.70, 14.30]  |
| Klug (early) 2012                                                                                            | 24.9              | 15.2 | 74             | 15.5             | 16.1 | 33             | 6.70%           | 9.40 [2.91, 15.89]   |
| mather (early), 2011                                                                                         | 19.8              | 9.5  | 18             | 11.3             | 9.4  | 18             | 7.10%           | 8.50 [2.33, 14.67]   |
| Nijveldt (early), 2009                                                                                       | 21                | 8    | 44             | 8.4              | 6.5  | 19             | 10.90%          | 12.60 [8.84, 16.36]  |
| Orn(early2d),2 days                                                                                          | 16.2              | 1.6  | 16             | 10.8             | 1.8  | 11             | 14.90%          | 5.40 [4.08, 6.72]    |
| Weir (early), 2010                                                                                           | 39.6              | 20.8 | 69             | 19.1             | 11.7 | 31             | 6.80%           | 20.50 [14.09, 26.91] |
| Wu (early), 1998                                                                                             | 32.6              | 9.6  | 11             | 22.9             | 10   | 33             | 6.60%           | 9.70 [3.08, 16.32]   |
| Total (95% CI)                                                                                               |                   |      | 408            |                  |      | 278            | 100.00%         | 10.71 [8.49, 12.92]  |
| Heterogeneity: Tau <sup>2</sup> = 8.11; Chi <sup>2</sup> = 60.80, df = 9 (P < 0.00001); I <sup>2</sup> = 85% |                   |      |                |                  |      |                |                 |                      |
| Test for overall effect: Z = 9.47 (P < 0.00001)                                                              |                   |      |                |                  |      |                |                 |                      |



**Table 4c: Data from studies looking at effect of early microvascular obstruction (EMVO) on baseline Left ventricular end-diastolic volume index (LVEDVi)**

| Study                                                                                                                                                                  | Early MVO Present |      |                | Early MVO Absent |      |                | Weight  | Mean difference IV, random (95% CI) |
|------------------------------------------------------------------------------------------------------------------------------------------------------------------------|-------------------|------|----------------|------------------|------|----------------|---------|-------------------------------------|
|                                                                                                                                                                        | Mean              | SD   | Total patients | Mean             | SD   | Total patients |         |                                     |
| Amabile (early),2010                                                                                                                                                   | 72.2              | 2.2  | 63             | 67.3             | 2.8  | 49             | 25.80%  | 4.90 [3.95, 5.85]                   |
| Bekkers(early), 2009_base                                                                                                                                              | 87                | 17   | 53             | 81               | 14   | 31             | 13.00%  | 6.00 [-0.73, 12.73]                 |
| Bogaert (early),2007,base                                                                                                                                              | 83                | 15.2 | 32             | 79.4             | 10.1 | 20             | 12.70%  | 3.60 [-3.28, 10.48]                 |
| Cochet (early) 2010                                                                                                                                                    | 84                | 28   | 28             | 75               | 21   | 33             | 5.70%   | 9.00 [-3.61, 21.61]                 |
| mather (early), 2011                                                                                                                                                   | 89.5              | 21.8 | 30             | 81.8             | 18.5 | 18             | 6.50%   | 7.70 [-3.87, 19.27]                 |
| Nijveldt (early), 2009                                                                                                                                                 | 103.2             | 22.8 | 44             | 91.8             | 26.9 | 19             | 4.90%   | 11.40 [-2.45, 25.25]                |
| Orn(early2d),2 days                                                                                                                                                    | 91.8              | 3.1  | 16             | 79.5             | 5    | 11             | 21.10%  | 12.30 [8.98, 15.62]                 |
| Weir (early), 2010                                                                                                                                                     | 84.5              | 16.7 | 69             | 84               | 21   | 31             | 10.20%  | 0.50 [-7.88, 8.88]                  |
| Total (95% CI)                                                                                                                                                         |                   |      | 335            |                  |      | 212            | 100.00% | 6.73 [3.32, 10.14]                  |
| Heterogeneity: Tau <sup>2</sup> = 11.46;<br>Chi <sup>2</sup> = 20.41, df = 7 (P = 0.005);<br>I <sup>2</sup> = 66%<br>Test for overall effect: Z = 3.87<br>(P = 0.0001) |                   |      |                |                  |      |                |         |                                     |

**Table 4d: Data from studies looking at effect of early microvascular obstruction (EMVO) on baseline Left ventricular end-systolic volume index (LVESVi)**

| Study                                                                                                   | Early MVO Present |      |                | Early MVO Absent |      |                | mean difference |                      |
|---------------------------------------------------------------------------------------------------------|-------------------|------|----------------|------------------|------|----------------|-----------------|----------------------|
|                                                                                                         | Mean              | SD   | Total patients | Mean             | SD   | Total patients | Weight          | IV, random (95% CI)  |
| Amabile (early),2010                                                                                    | 37.7              | 1.8  | 63             | 31               | 1.8  | 49             | 89.40%          | 6.70 [6.03, 7.37]    |
| Bekkers(early), 2009_base                                                                               | 45                | 13   | 53             | 37               | 11   | 31             | 1.50%           | 8.00 [2.78, 13.22]   |
| Bogaert (early),2007,base                                                                               | 45                | 11   | 32             | 39.5             | 7.8  | 20             | 1.50%           | 5.50 [0.38, 10.62]   |
| Cochet (early) 2010                                                                                     | 46                | 31   | 28             | 30               | 14   | 33             | 0.30%           | 16.00 [3.56, 28.44]  |
| mather (early), 2011                                                                                    | 48.5              | 19.1 | 18             | 39.2             | 15.4 | 18             | 0.30%           | 9.30 [-2.03, 20.63]  |
| Nijveldt (early), 2009                                                                                  | 62.1              | 20.1 | 44             | 50.9             | 21.3 | 19             | 0.30%           | 11.20 [-0.07, 22.47] |
| Orn(early2d),2 days                                                                                     | 47.1              | 3.1  | 16             | 40               | 3.6  | 11             | 5.90%           | 7.10 [4.49, 9.71]    |
| Weir (early), 2010                                                                                      | 44.3              | 13.4 | 69             | 42.7             | 18.8 | 31             | 0.80%           | 1.60 [-5.73, 8.93]   |
| Total (95% CI)                                                                                          |                   |      | 323            |                  |      | 212            | 100.00%         | 6.73 [6.10, 7.37]    |
| Heterogeneity: Tau <sup>2</sup> = 0.00; Chi <sup>2</sup> = 5.35, df = 7 (P = 0.62); I <sup>2</sup> = 0% |                   |      |                |                  |      |                |                 |                      |
| Test for overall effect: Z = 20.77 (P < 0.00001)                                                        |                   |      |                |                  |      |                |                 |                      |

**Table 5a: Data from studies looking at effect of Late microvascular obstruction (LMVO) on baseline left ventricular ejection fraction (LVEF)**

| Study                | Late MVO Present |      |                | Late MVO Absent |      |                | Weight      | Mean difference<br>IV, fixed (95% CI) |
|----------------------|------------------|------|----------------|-----------------|------|----------------|-------------|---------------------------------------|
|                      | Mean             | SD   | Total patients | Mean            | SD   | Total patients |             |                                       |
| Bekkers (late),2009  | 48               | 7    | 45             | 56              | 7    | 31             | 21.70%      | -8.00 [-11.20, -4.80]                 |
| Cochet (late) 2010   | 44               | 20   | 17             | 60              | 9    | 44             | 5.00%       | -16.00 [-25.87, -6.13]                |
| Hombach(late),2005,  | 54.3             | 10.1 | 51             | 59.3            | 10.8 | 59             | 18.20%      | -5.00 [-8.91, -1.09]                  |
| Mewton (late), 2009  | 59               | 7    | 8              | 63              | 10   | 17             | 9.20%       | -4.00 [-10.79, 2.79]                  |
| Nijveldt (late),2009 | 40               | 9    | 37             | 45.9            | 8.1  | 26             | 16.70%      | -5.90 [-10.15, -1.65]                 |
| Vicente(late),2009,  | 44.5             | 11   | 26             | 51              | 9.4  | 12             | 9.20%       | -6.50 [-13.29, 0.29]                  |
| Wier (late), 2010    | 48.4             | 7.4  | 56             | 50.5            | 10.1 | 44             | 19.90%      | -2.10 [-5.66, 1.46]                   |
| Total (95% CI)       |                  |      | 240            |                 |      | 233            | 100.00<br>% | -5.82 [-8.21, -3.43]                  |

Heterogeneity: Tau<sup>2</sup> = 4.17; Chi<sup>2</sup> = 10.52, df = 6 (P = 0.10); I<sup>2</sup> = 43%

Test for overall effect: Z = 4.78 (P < 0.00001)

**Table 5b: Data from studies looking at effect late microvascular obstruction (LMVO) on baseline Infarct size (IS):**

| Study                   | Early MVO Present |      |                | Early MVO Absent |      |                | Weight  | mean difference<br>IV, fixed (95% CI) |
|-------------------------|-------------------|------|----------------|------------------|------|----------------|---------|---------------------------------------|
|                         | Mean              | SD   | Total patients | Mean             | SD   | Total patients |         |                                       |
| Bekkers (late), 2009    | 23                | 9    | 45             | 6                | 8    | 31             | 13.90%  | 17.00 [13.15, 20.85]                  |
| Cochet (late) 2010      | 18                | 7    | 17             | 6                | 6    | 44             | 14.00%  | 12.00 [8.23, 15.77]                   |
| Hombach(late),2005,base | 16.2              | 7.2  | 51             | 8.1              | 5.1  | 59             | 16.10%  | 8.10 [5.73, 10.47]                    |
| Mather (late), 2011     | 19.8              | 9.5  | 18             | 11.3             | 9.4  | 18             | 10.30%  | 8.50 [2.33, 14.67]                    |
| Nijveldt (late),2009    | 22.6              | 7.3  | 37             | 9.4              | 6.5  | 26             | 14.60%  | 13.20 [9.77, 16.63]                   |
| Vicente(late),2009,base | 29.2              | 11.1 | 26             | 16.2             | 10.2 | 12             | 9.00%   | 13.00 [5.82, 20.18]                   |
| Wier (late), 2010       | 42.3              | 21.3 | 56             | 19.1             | 11.7 | 31             | 9.30%   | 23.20 [16.27, 30.13]                  |
| Wu (late), 2008         | 29                | 14   | 51             | 17               | 11   | 71             | 12.70%  | 12.00 [7.38, 16.62]                   |
| Total (95% CI)          |                   |      | 301            |                  |      | 292            | 100.00% | 13.01 [9.95, 16.07]                   |

Heterogeneity: Tau<sup>2</sup> = 13.64; Chi<sup>2</sup> = 28.64, df = 7 (P = 0.0002); I<sup>2</sup> = 76%

Test for overall effect: Z = 8.34 (P < 0.00001)

**Table 5c: Data from studies looking at effect of late microvascular obstruction (LMVO) on baseline Left ventricular end-diastolic volume index (LVEDVi)**

| Study                    | Early MVO Present |      |                | Early MVO Absent |      |                | Weight  | mean difference<br>IV, fixed (95% CI) |
|--------------------------|-------------------|------|----------------|------------------|------|----------------|---------|---------------------------------------|
|                          | Mean              | SD   | Total patients | Mean             | SD   | Total patients |         |                                       |
| Bekkers (late),2009,base | 86                | 17   | 45             | 81               | 14   | 31             | 18.50%  | 5.00 [-2.00, 12.00]                   |
| Cochet (late) 2010       | 93                | 31   | 17             | 74               | 20   | 44             | 9.60%   | 19.00 [3.12, 34.88]                   |
| Mather (late), 2011      | 89.5              | 21.8 | 30             | 81.8             | 18.5 | 18             | 13.30%  | 7.70 [-3.87, 19.27]                   |
| Mewton (late), 2009      | 61                | 9.8  | 8              | 55.4             | 17.2 | 17             | 14.30%  | 5.60 [-5.03, 16.23]                   |
| Nijveldt (late),2009     | 106.6             | 21.3 | 37             | 89.9             | 25.5 | 26             | 12.90%  | 16.70 [4.73, 28.67]                   |
| Vicente(late),2009,base  | 66.2              | 14.9 | 26             | 77               | 16.8 | 12             | 13.80%  | -10.80 [-21.90, 0.30]                 |
| Wier (late), 2010        | 84.2              | 16.7 | 56             | 84               | 21   | 44             | 17.80%  | 0.20 [-7.39, 7.79]                    |
| Total (95% CI)           |                   |      | 219            |                  |      | 192            | 100.00% | 5.26 [-1.08, 11.60]                   |

Heterogeneity:  $\tau^2 = 43.92$ ;  
 $\chi^2 = 16.08$ ,  $df = 6$  ( $P = 0.01$ );  $I^2 = 63\%$   
Test for overall effect:  $Z = 1.63$   
( $P = 0.10$ )

**Table 5d: Data from studies looking at effect of late microvascular obstruction (LMVO) on baseline Left ventricular end-systolic volume index (LVESVi)**

| Study                                                                                                                                                      | Early MVO Present |      |                | Early MVO Absent |      |                | Weight  | Mean difference<br>IV, fixed (95% CI) |
|------------------------------------------------------------------------------------------------------------------------------------------------------------|-------------------|------|----------------|------------------|------|----------------|---------|---------------------------------------|
|                                                                                                                                                            | Mean              | SD   | Total patients | Mean             | SD   | Total patients |         |                                       |
| Cochet (late) 2010                                                                                                                                         | 57                | 35   | 17             | 30               | 13   | 44             | 11.70%  | 27.00 [9.92, 44.08]                   |
| Mather (late), 2011                                                                                                                                        | 48.5              | 19.1 | 18             | 39.2             | 15.4 | 18             | 18.10%  | 9.30 [-2.03, 20.63]                   |
| Mewton (late), 2009                                                                                                                                        | 25.3              | 5.9  | 8              | 21.8             | 13   | 17             | 24.20%  | 3.50 [-3.91, 10.91]                   |
| Nijveldt (late),2009                                                                                                                                       | 64.9              | 19.9 | 37             | 49.9             | 19.5 | 26             | 20.30%  | 15.00 [5.14, 24.86]                   |
| Wier (late), 2010                                                                                                                                          | 44                | 12.7 | 56             | 42.7             | 18.8 | 44             | 25.70%  | 1.30 [-5.17, 7.77]                    |
| Total (95% CI)                                                                                                                                             |                   |      | 136            |                  |      | 149            | 100.00% | 9.06 [1.76, 16.37]                    |
| Heterogeneity: Tau <sup>2</sup> = 43.20; Chi <sup>2</sup> = 11.73, df = 4 (P = 0.02); I <sup>2</sup> = 66%<br>Test for overall effect: Z = 2.43 (P = 0.02) |                   |      |                |                  |      |                |         |                                       |
